# Supplementary material for: Synergistically enhanced wide spectrum photodetection of a heterogeneous trilayer CsPbI3/PbS/ZnO architecture
Source: Royal Society of Chemistry journal article supplement (doi:10.1039/d2tc03212k), 2022-01-01
Supplement: d2tc03212k1.pdf [file d2tc03212k1.pdf]

Electronic Supplementary Information (ESI)

**Synergistically enhanced wide spectrum photodetection of  
heterogeneous trilayer CsPbI<sub>3</sub>/PbS/ZnO architecture**

Xinhong Zhao,<sup>a\*</sup> Yongchu Fang,<sup>a</sup> Jixiang Dong,<sup>a</sup> Xiaoxian Song,<sup>a</sup> Huaqing Yu,<sup>b</sup> Peng Wang,<sup>c</sup> Zaoxue Yan<sup>d\*\*</sup>

<sup>a</sup> School of Mechanical Engineering, Jiangsu University, Zhenjiang 212013, China

<sup>b</sup> School of Physics and Electronic Information Engineering, Hubei Engineering University, Xiaogan 432000, China

<sup>c</sup> School of Physical Science and Technology, Lanzhou University, Lanzhou 730000, China

<sup>d</sup> School of Chemistry and Chemical Engineering, Jiangsu University, Zhenjiang 212013, China

Corresponding author. E-mail: xhzhao@ujs.edu.cn (X. Zhao), yanzaoxue@163.com (Z. Yan)

**Keywords:** heterogeneous trilayer, perovskite, quantum dots, photodetection, flexible optoelectronic devices.

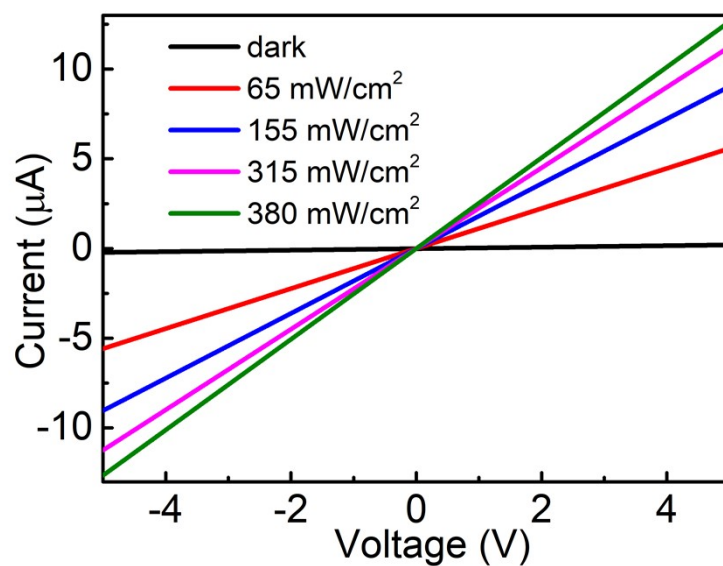

**Figure S1.** Output characteristic curves of CsPbI<sub>3</sub>/PbS/ZnO photodetectors under 532 nm light illumination.

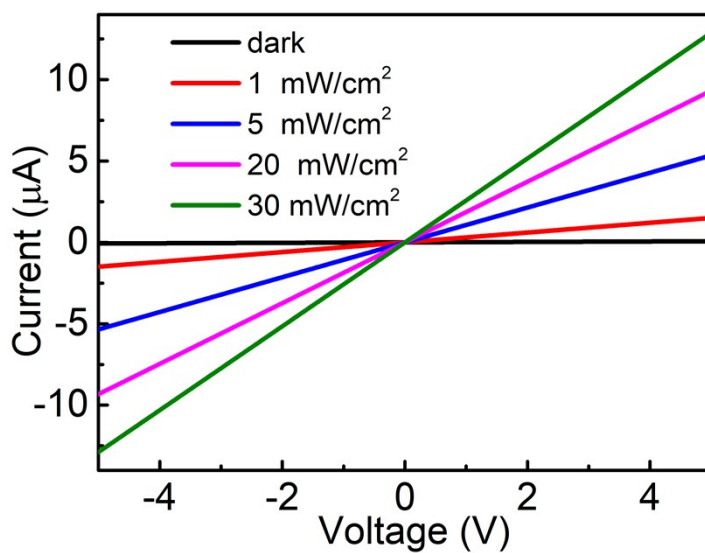

**Figure S2.** Output characteristic curves of CsPbI<sub>3</sub>/PbS/ZnO photodetectors under 808 nm light illumination.

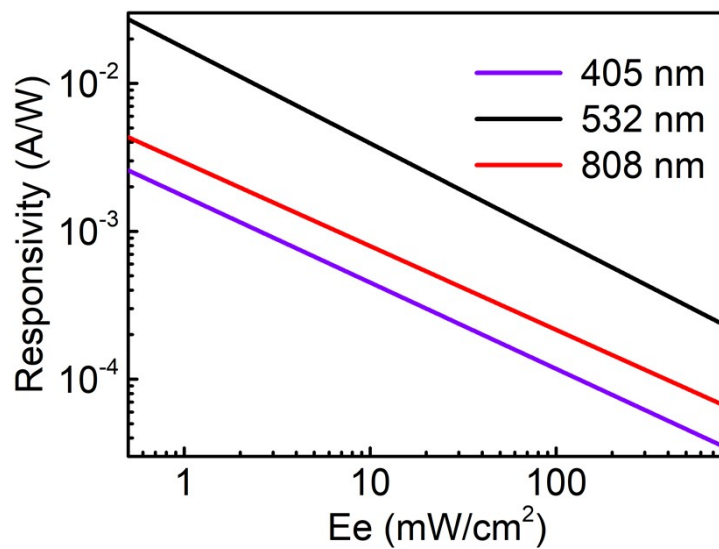

**Figure S3.** Optical responsivity vs. incident light power density of PbS QDs photodetectors under 405, 532 and 808 nm light illumination.

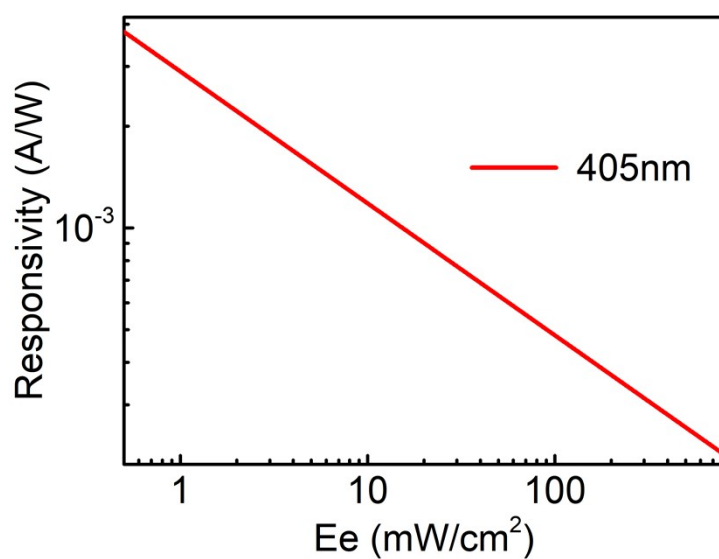

**Figure S4.** Optical responsivity vs. incident light power density of ZnO QDs photodetectors under 405 nm light illumination.

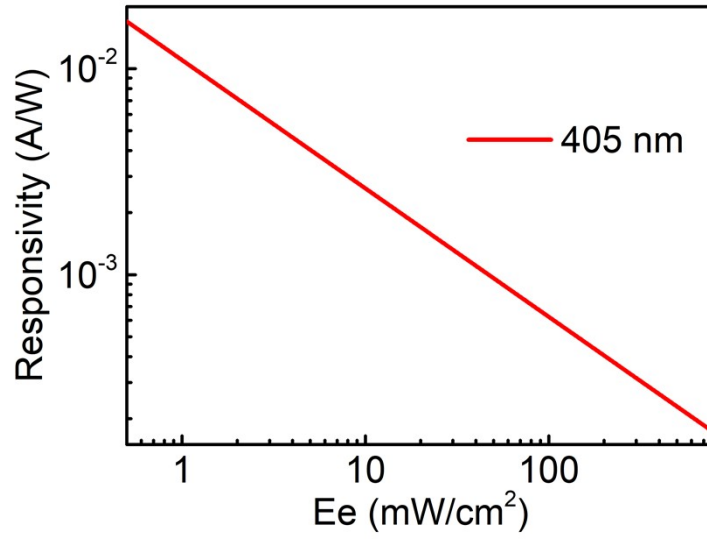

**Figure S5.** Optical responsivity vs. incident light power density of CsPbI<sub>3</sub> QDs photodetectors under 405 nm light illumination.

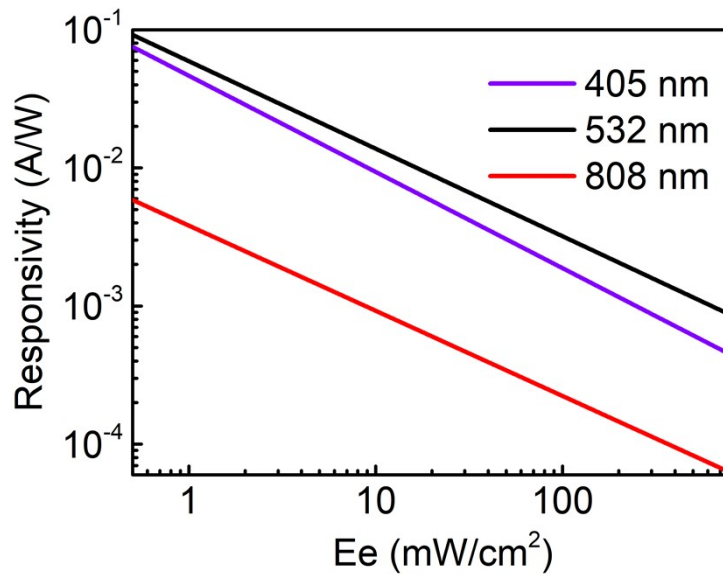

**Figure S6.** Optical responsivity vs. incident light power density of PbS/ZnO photodetectors under 405, 532 and 808 nm light illumination.

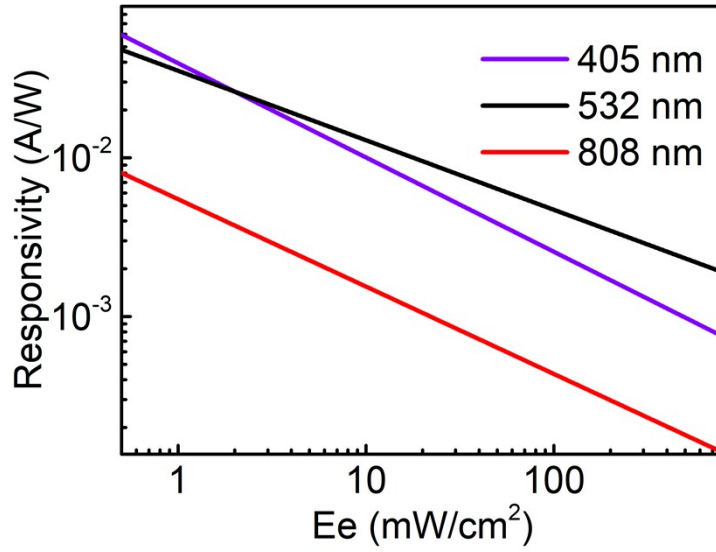

**Figure S7.** Optical responsivity vs. incident light power density of CsPbI<sub>3</sub>/PbS photodetectors under 405, 532 and 808 nm light illumination.

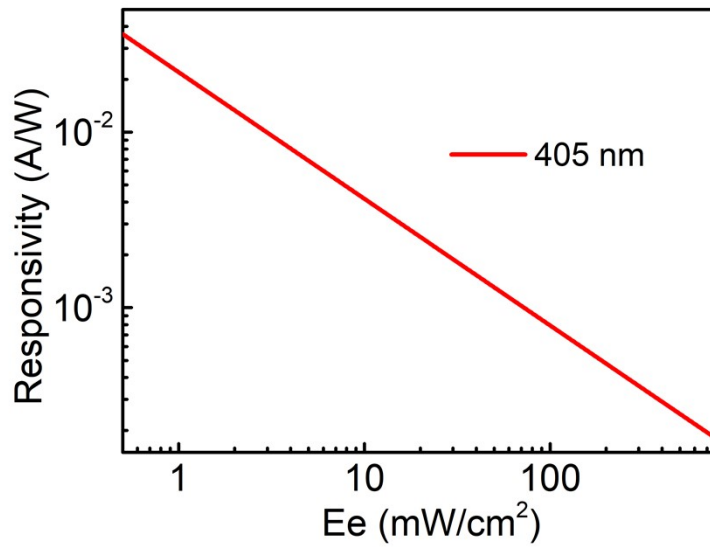

**Figure S8.** Optical responsivity vs. incident light power density of CsPbI<sub>3</sub>/ZnO photodetectors under 405 nm light illumination.

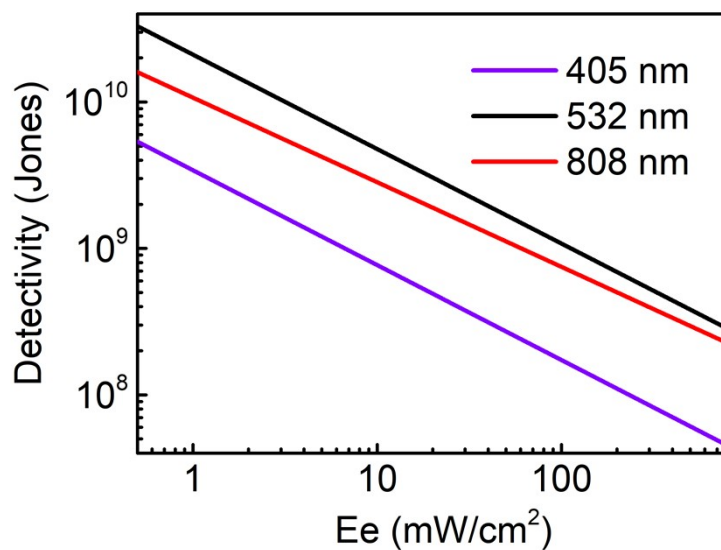

**Figure S9.** Detectivity vs. incident light power density of PbS QDs photodetectors under 405, 532, and 808 nm light illumination.

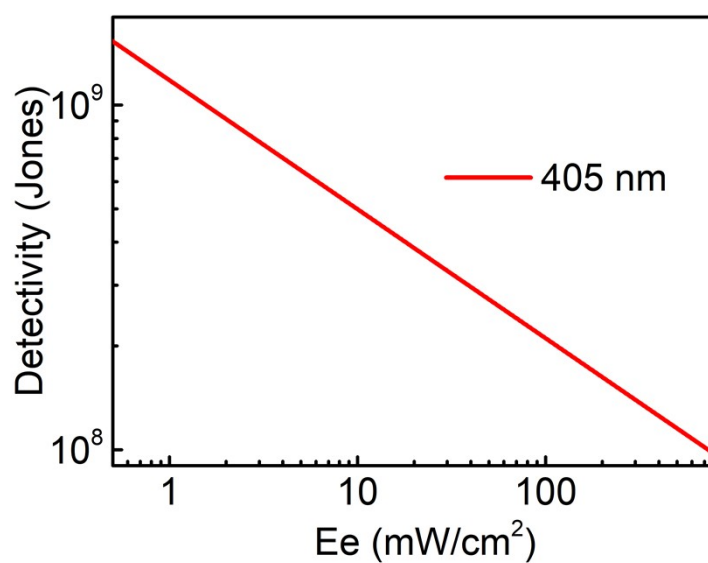

**Figure S10.** Detectivity vs. incident light power density of ZnO QDs photodetectors under 405 nm light illumination.

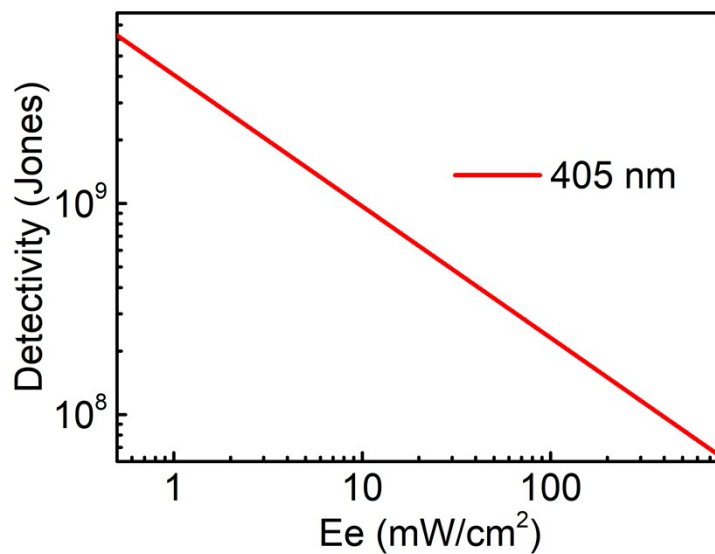

**Figure S11.** Detectivity vs. incident light power density of CsPbI<sub>3</sub> QDs photodetectors under 405 nm light illumination.

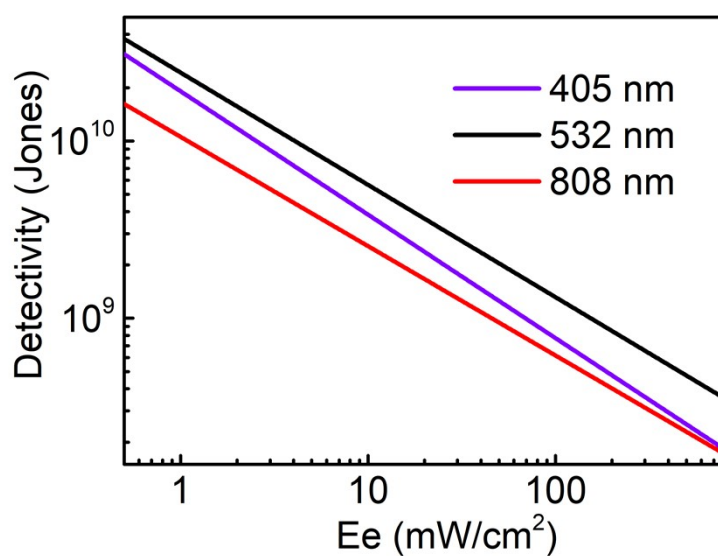

**Figure S12.** Detectivity vs. incident light power density of PbS/ZnO photodetectors under 405, 532 and 808 nm light illumination.

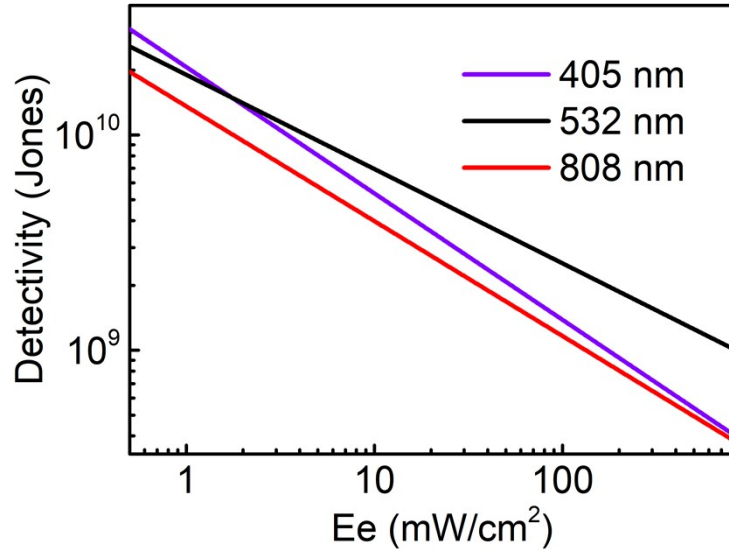

**Figure S13.** Detectivity vs. incident light power density of CsPbI<sub>3</sub>/PbS photodetectors under 405, 532 and 808 nm light illumination.

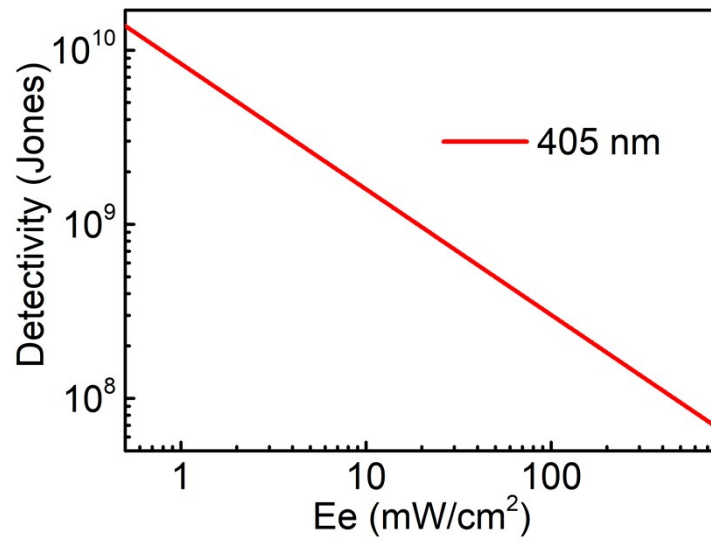

**Figure S14.** Detectivity vs. incident light power density of CsPbI<sub>3</sub>/ZnO photodetectors under 405 nm light illumination.



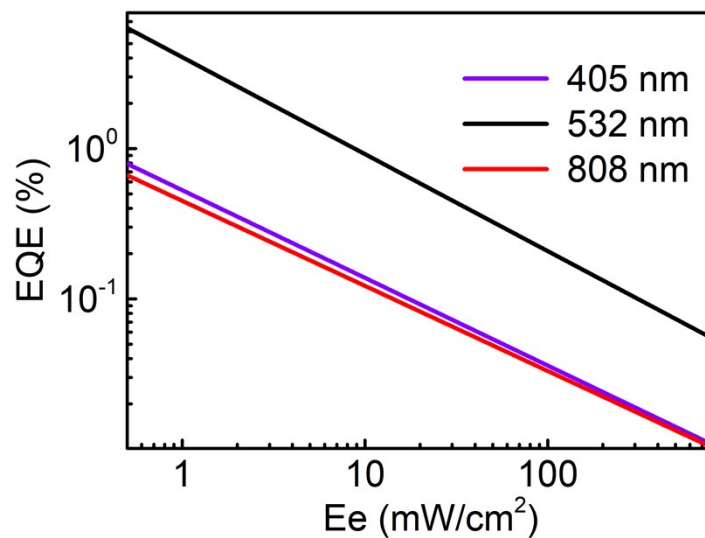

**Figure S15.** *EQE* vs. incident light power density of PbS QDs photodetectors under 405, 532 and 808 nm light illumination.

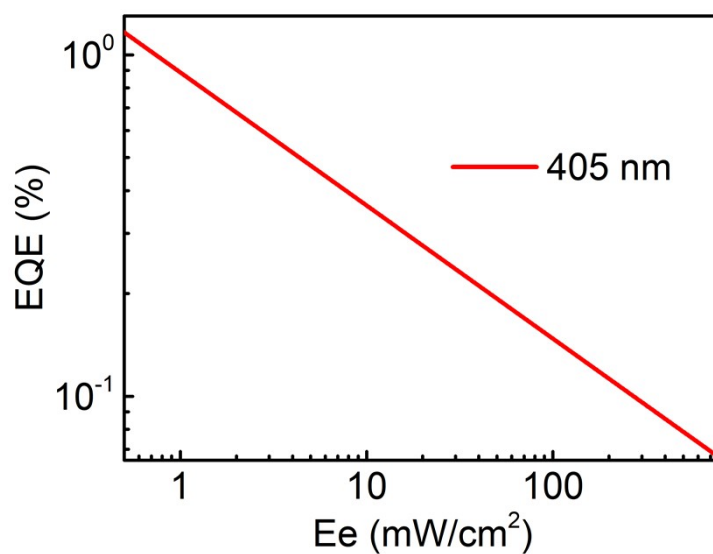

**Figure S16.** *EQE* vs. incident light power density of ZnO QDs photodetectors under 405 nm light illumination.

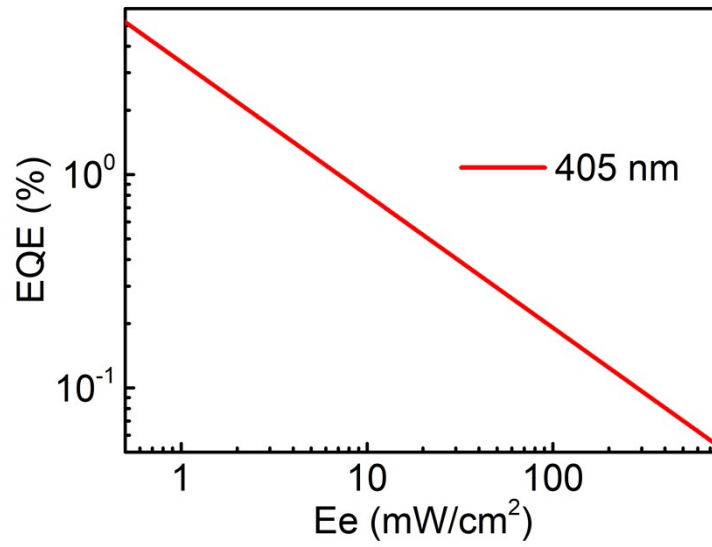

**Figure S17.** *EQE* vs. incident light power density of CsPbI<sub>3</sub> QDs photodetectors under 405 nm light illumination.

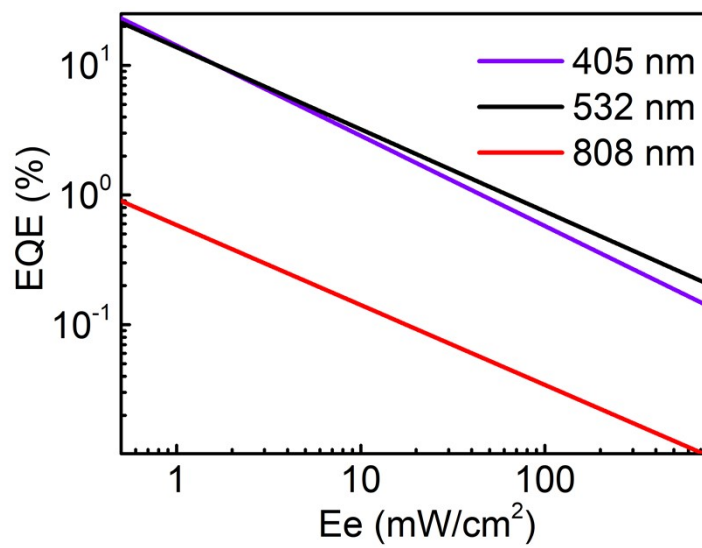

**Figure S18.** *EQE* vs. incident light power density of PbS/ZnO photodetectors under 405, 532 and 808 nm light illumination.

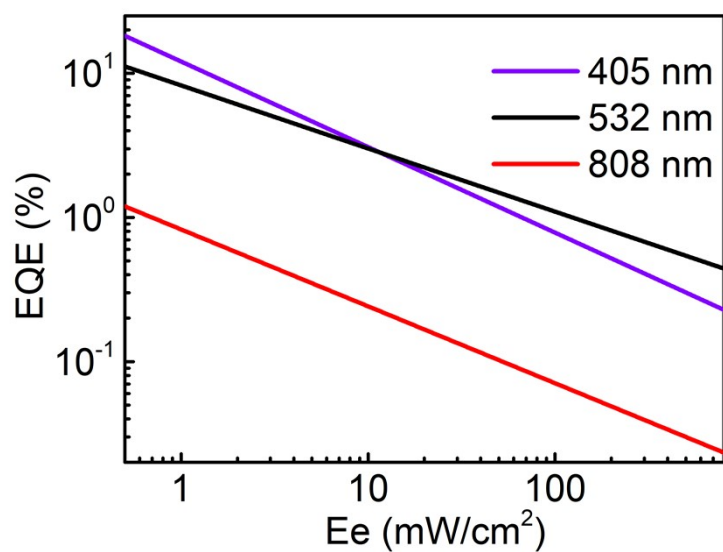

**Figure S19.** *EQE* vs. incident light power density of CsPbI<sub>3</sub>/PbS photodetectors under 405, 532 and 808 nm light illumination.

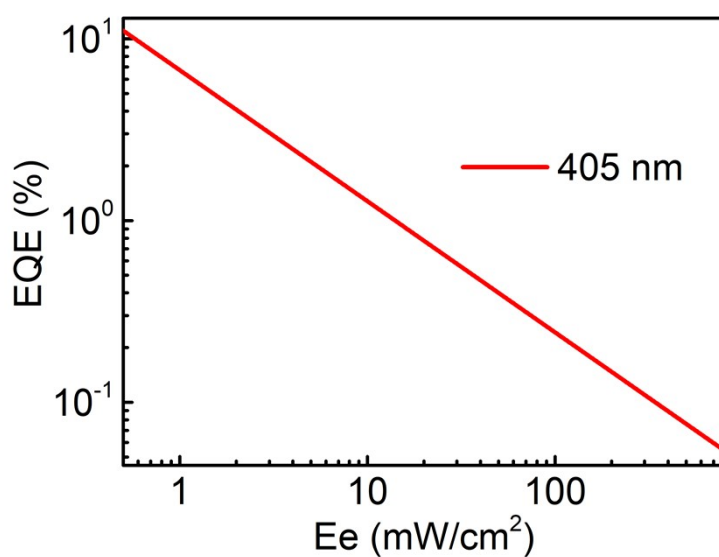

**Figure S20.** *EQE* vs. incident light power density of CsPbI<sub>3</sub>/ZnO photodetectors under 405 nm light illumination.

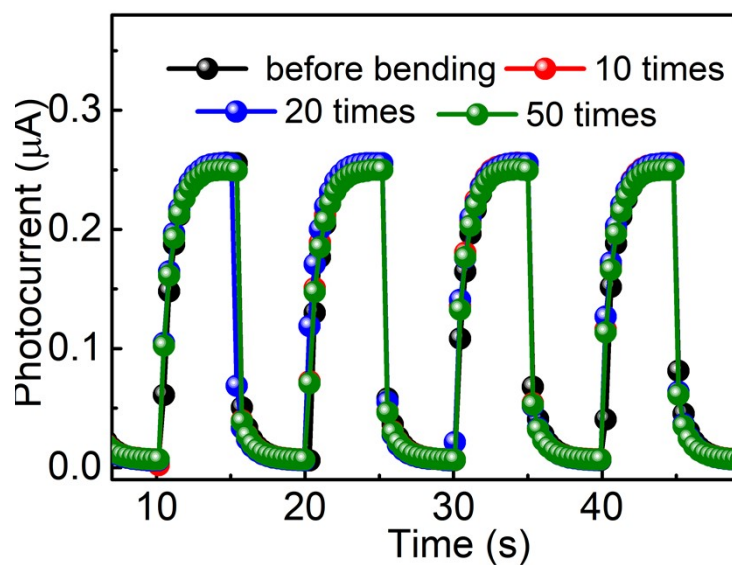

**Figure S21.** Time response curves of flexible CsPbI<sub>3</sub>/PbS/ZnO photodetectors under 532 nm light illumination.

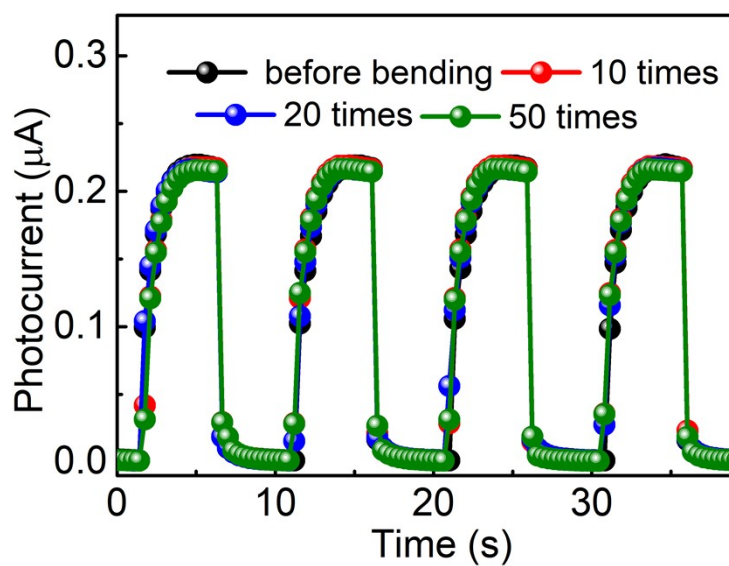

**Figure S22.** Time response curves of flexible CsPbI<sub>3</sub>/PbS/ZnO photodetectors under 808 nm light illumination.

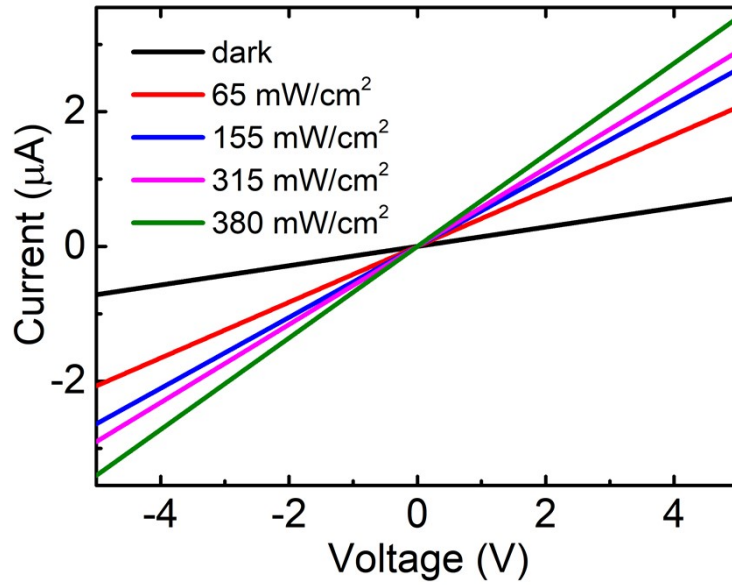

**Figure S23.** Output characteristics curves of flexible CsPbI<sub>3</sub>/PbS/ZnO photodetectors under 532 nm light illumination.

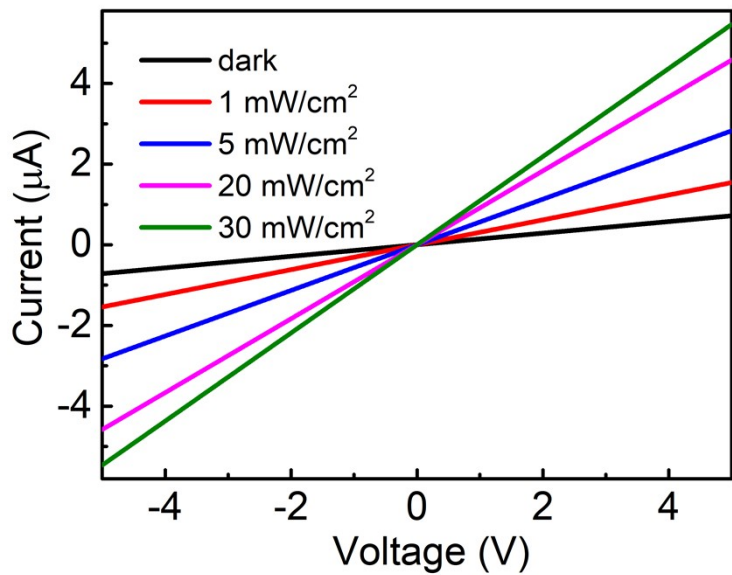

**Figure S24.** Output characteristics curves of flexible CsPbI<sub>3</sub>/PbS/ZnO photodetectors under 808 nm light illumination.

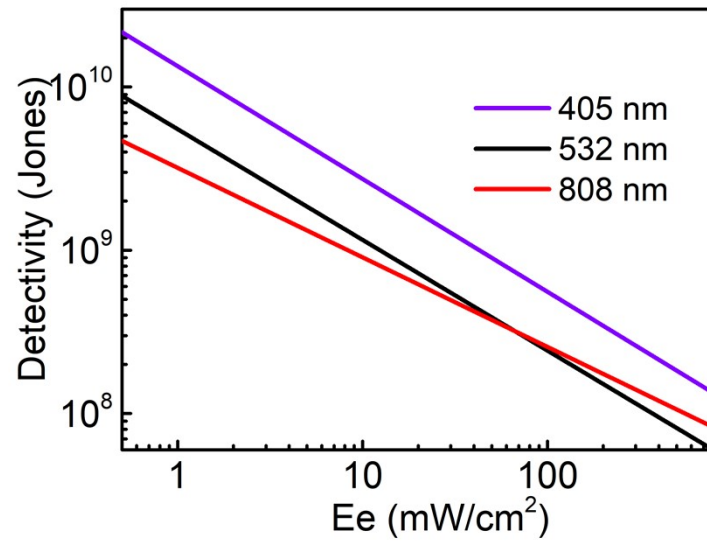

**Figure S25.** Detectivity vs. incident light power density of flexible CsPbI<sub>3</sub>/PbS/ZnO photodetectors under 405, 532 and 808 nm light illumination.
